# Supplementary material for: Older adults who receive homecare are at increased risk of readmission and mortality following a short ED admission: a nationally register-based cohort study
Source: Springer Nature journal article supplement (doi:10.1186/s12877-021-02644-6), 2021-12-01
Supplement: MOESM2 [file 19962700]

## Additional file 2

We performed the same analyses, where the months with inadequate data from municipalities were excluded, as sensitivity analyses (7,600 patients) (see Table 4).

**Table 4: Association between homecare categories and readmission rate and mortality, excluding patients from municipalities with inadequate data**

| Variables            | Patients with no homecare | Patients receiving homecare ≤ 30 min/week | Patients receiving homecare > 30 to ≤ 120 min/week | Patients receiving homecare > 120 min/week |
|----------------------|---------------------------|-------------------------------------------|----------------------------------------------------|--------------------------------------------|
| Readmission < 7days  |                           |                                           |                                                    |                                            |
| Crude OR (95% CI)    | 1 (ref.)                  | 1.29 (1.16–1.44)**                        | 1.27 (1.13–1.44)**                                 | 1.54 (1.40–1.69)**                         |
| Adjusted OR (95% CI) |                           | 1.18 (1.05–1.33)*                         | 1.15 (1.01–1.30)*                                  | 1.31 (1.18–1.45)**                         |
| Readmission < 30days |                           |                                           |                                                    |                                            |
| Crude OR (95% CI)    | 1 (ref.)                  | 1.44 (1.33–1.56)**                        | 1.48 (1.35–1.62)**                                 | 1.85 (1.73–1.98)**                         |
| Adjusted OR (95% CI) |                           | 1.25 (1.14–1.36)**                        | 1.25 (1.14–1.37)**                                 | 1.45 (1.34–1.56)**                         |
| Mortality < 30 days  |                           |                                           |                                                    |                                            |
| Crude OR (95% CI)    | 1 (ref.)                  | 1.80 (1.55–2.07)**                        | 2.27 (1.97–2.62)**                                 | 4.67 (4.26–5.12)**                         |
| Adjusted OR (95% CI) |                           | 1.16 (0.98–1.36)                          | 1.35 (1.14–1.58)**                                 | 2.45 (2.18–2.75)**                         |
| Mortality < 180 days |                           |                                           |                                                    |                                            |
| Crude OR (95% CI)    | 1 (ref.)                  | 1.80 (1.63–1.98)**                        | 2.31 (2.09–2.54)**                                 | 4.68 (4.38–5.00)**                         |
| Adjusted OR (95% CI) |                           | 1.16 (1.04–1.29)*                         | 1.38 (1.24–1.54)**                                 | 2.46 (2.27–2.66)**                         |
| Mortality < 360 days |                           |                                           |                                                    |                                            |
| Crude OR (95% CI)    | 1 (ref.)                  | 1.89 (1.74–2.05)**                        | 2.43 ( 2.23 – 2.64)**                              | 4.93 (4.65–5.23)**                         |
| Adjusted OR (95% CI) |                           | 1.22 (1.11–1.34)**                        | 1.46 (1.33 – 1.61)**                               | 2.63 (2.46–2.83)**                         |

**Notes:** OR is the odds ratio and CI is confidence intervals. The logistic regression analyses were adjusted for age, sex, marital status, income, Charlson Comorbidity Index and treatment for mental disorder. Significance levels with a p-value of < 0.05 are marked with \* and significance levels with a p-value of < 0.001 are marked with\*\*.
